# Supplementary material for: Trimethoprim use for urinary tract infection and risk of adverse outcomes in older patients: cohort study
Source: PubMed Central journal article supplement (PMC5806507; doi:10.1136/bmj.k341), 2018-02-09
Supplement: cree040349.ww1.pdf [file cree040349.ww1.pdf]

## SUPPLEMENTARY APPENDIX

### Text S1: Inverse probability of treatment weighting analysis

To ensure that we were assessing risk of sudden death, acute kidney injury, and hyperkalaemia between comparable groups (to reduce confounding by indication), we examined the risks of all three outcomes between groups of trimethoprim and amoxicillin users after propensity score weighting (IPTW). We calculated propensity scores for patients using logistic regression to predict choice of antibiotic (trimethoprim or amoxicillin). Factors included in the propensity score model were the covariates adjusted for in the primary analysis (age, sex, renal function, chronic comorbidities, history of renal or urological disease, calendar period, and co-prescription with renin-angiotensin system blockers or potassium-sparing diuretics). Then, for each patient, a weight defined as the inverse of the probability the treatment they had received was calculated. Finally, a weighted logistic regression was used to estimate the marginal odds ratios (ORs) for each of the three outcomes.

The propensity score was first estimated with a logistic regression including all the variables listed in **Table 1** (n=273,736). When estimating the standardized differences before propensity score weighting, only age, sex, cardiac failure and arrhythmia were unbalanced (standardized difference >10%, see Table 1). After weighting on the propensity score, all variables were balanced (**Table 1**).

**Table 1.** Balance of the covariates before and after propensity score adjustment (n=273,736)

| Variable                                   | Standardised difference (%) |            |
|--------------------------------------------|-----------------------------|------------|
|                                            | Before IPTW                 | After IPTW |
| <b>Age</b>                                 | 13.0                        | 0.5        |
| <b>Sex</b>                                 | 11.2                        | 0.3        |
| <b>Renal function</b>                      | 5.7                         | 0.5        |
| <b>Comorbidities</b>                       |                             |            |
| Diabetes mellitus                          | 6.1                         | 0.7        |
| Ischaemic heart disease                    | 7.3                         | 0.6        |
| Cardiac failure                            | 11.3                        | 0.8        |
| Arrhythmia                                 | 11.1                        | 0.5        |
| Hypertension                               | 5.5                         | 0.3        |
| <b>History of renal/urological disease</b> |                             |            |
| Prostatic hypertrophy                      | 4.7                         | 0.4        |
| Calculi                                    | 4.7                         | 0.0        |
| Malignancy                                 | 1.3                         | 0.4        |
| Urological structural abnormalities        | 3.7                         | 0.2        |
| <b>Co-prescription</b>                     |                             |            |
| RAS blocker                                | 4.1                         | 0.3        |
| Potassium-sparing diuretic                 | 4.4                         | 0.4        |
| <b>Other</b>                               |                             |            |
| Calendar period                            | 0.5                         | 0.0        |

RAS blocker: Angiotensin converting enzyme inhibitor/angiotensin receptor blocker

IPTW: inverse probability of treatment weighting

## Results

**Table 2** gives the results of the multivariable regression and inverse probability treatment weighting (IPTW) propensity score approaches for the three outcomes.

**Table 2.** Results comparing the odds of death, acute kidney injury, or hyperkalaemia in those prescribed trimethoprim for urinary tract infection compared to those prescribed amoxicillin using different analysis approaches.

| Method                   | Acute kidney injury |      |             | Hyperkalaemia |      |             | Death   |      |             |
|--------------------------|---------------------|------|-------------|---------------|------|-------------|---------|------|-------------|
|                          | n                   | OR   | 95% CI      | n             | OR   | 95% CI      | n       | OR   | 95% CI      |
| Multivariable regression | 273,736             | 1.73 | [1.34;2.24] | 273,736       | 2.26 | [1.51;3.38] | 273,736 | 0.90 | [0.76;1.07] |
| IPTW                     |                     | 1.65 | [1.27;2.14] |               | 2.48 | [1.64;3.75] |         | 0.85 | [0.72;1.01] |

IPTW: inverse probability treatment weighting.

Note that multivariable regression and IPTW give different estimates because the former aims to estimate conditional effects and the latter marginal effects

**Table S1.** Odds ratios (95% CIs) for AKI, hyperkalaemia and death within 14 days of antibiotic treatment for urinary tract infection in sequentially adjusted logistic regression models.

|                                                      |                            | Acute kidney injury odds ratio (95% CI) |                                                        |                    | Hyperkalaemia odds ratio (95% CI) |                                              |                     | Death odds ratio (95% CI) |                                              |                   |
|------------------------------------------------------|----------------------------|-----------------------------------------|--------------------------------------------------------|--------------------|-----------------------------------|----------------------------------------------|---------------------|---------------------------|----------------------------------------------|-------------------|
|                                                      |                            | Adjusted for age and sex                | Adjusted for age, sex, calendar year and comorbidities | Fully adjusted     | Adjusted for age and sex          | Adjusted for calendar year and comorbidities | Fully adjusted      | Adjusted for age and sex  | Adjusted for calendar year and comorbidities | Fully adjusted    |
|                                                      |                            | n=422,514                               | n=422,514                                              | n=422,514          | n=422,514                         | n=422,514                                    | n=422,514           | n=422,514                 | n=422,514                                    | n=422,514         |
| <b>Class of antibiotic (exposure of interest)</b>    | Amoxicillin                | reference                               | reference                                              | reference          | reference                         | reference                                    | reference           | reference                 | reference                                    | reference         |
|                                                      | Trimethoprim               | 1.43 (1.09-1.87)                        | 1.49 (1.13-1.95)                                       | 1.72 (1.31-2.24)   | 1.82 (1.19-2.78)                  | 1.93 (1.26-2.95)                             | 2.27 (1.49-3.45)    | 0.86 (0.72-1.02)          | 0.88 (0.74-1.04)                             | 0.90 (0.76-1.07)  |
|                                                      | Cefalexin                  | 0.70 (0.51-0.96)                        | 0.97 (0.71-1.31)                                       | 1.01 (0.74-1.37)   | 1.01 (0.65-1.57)                  | 1.12 (0.72-1.74)                             | 1.20 (0.77-1.85)    | 0.97 (0.80-1.18)          | 0.96 (0.79-1.17)                             | 0.97 (0.80-1.18)  |
|                                                      | Ciprofloxacin              | 1.18 (0.82-1.69)                        | 1.41 (0.98-2.02)                                       | 1.48 (1.03-2.13)   | 1.05 (0.60-1.83)                  | 1.12 (0.64-1.96)                             | 1.17 (0.68-2.02)    | 0.90 (0.72-1.12)          | 0.90 (0.72-1.13)                             | 0.92 (0.73-1.15)  |
|                                                      | Nitrofurantoin             | 1.05 (0.76-1.45)                        | 0.73 (0.52-1.01)                                       | 0.89 (0.65-1.24)   | 1.04 (0.63-1.70)                  | 0.87 (0.53-1.44)                             | 1.07 (0.65-1.75)    | 0.66 (0.53-0.81)          | 0.69 (0.56-0.86)                             | 0.72 (0.58-0.89)  |
| <b>Sex</b>                                           | Female                     | 0.32 (0.28-0.36)                        | 0.36 (0.32-0.41)                                       | 0.34 (0.29-0.39)   | 0.41 (0.34-0.49)                  | 0.47 (0.39-0.56)                             | 0.42 (0.34-0.51)    | 0.47 (0.43-0.51)          | 0.50 (0.46-0.54)                             | 0.44 (0.40-0.49)  |
| <b>Age</b>                                           | 65-69                      | reference                               | reference                                              | reference          | reference                         | reference                                    | reference           | reference                 | reference                                    | reference         |
|                                                      | 70-74                      | 1.41 (1.09-1.81)                        | 1.35 (1.05-1.74)                                       | 1.22 (0.94-1.58)   | 1.06 (0.77-1.44)                  | 0.96 (0.71-1.32)                             | 0.82 (0.60-1.13)    | 1.58 (1.24-2.02)          | 1.56 (1.22-2.00)                             | 1.57 (1.23-2.01)  |
|                                                      | 75-79                      | 1.92 (1.51-2.44)                        | 1.69 (1.33-2.15)                                       | 1.34 (1.04-1.71)   | 1.32 (1.01-1.72)                  | 1.11 (0.85-1.46)                             | 0.83 (0.63-1.10)    | 2.41 (1.97-2.94)          | 2.30 (1.88-2.81)                             | 2.30 (1.87-2.82)  |
|                                                      | 80-84                      | 3.23 (2.55-4.07)                        | 2.55 (2.01-3.23)                                       | 1.78 (1.38-2.29)   | 1.96 (1.49-2.59)                  | 1.51 (1.15-1.98)                             | 0.98 (0.74-1.30)    | 4.12 (3.34-5.09)          | 3.77 (3.04-4.67)                             | 3.68 (2.96-4.57)  |
|                                                      | 85+                        | 6.08 (4.92-7.53)                        | 4.18 (3.36-5.21)                                       | 2.47 (1.96-3.12)   | 2.28 (1.73-3.01)                  | 1.62 (1.22-2.14)                             | 0.91 (0.68-1.23)    | 10.91 (8.90-13.36)        | 9.29 (7.52-11.47)                            | 8.52 (6.89-10.54) |
| <b>Calendar period</b>                               | 1997-2000                  |                                         | reference                                              | reference          |                                   | reference                                    | reference           |                           | reference                                    | reference         |
|                                                      | 2001-2004                  |                                         | 1.72 (1.03-2.87)                                       | 1.62 (0.96-2.74)   |                                   | 2.24 (1.35-3.71)                             | 1.81 (1.08-3.03)    |                           | 0.92 (0.79-1.07)                             | 0.98 (0.83-1.15)  |
|                                                      | 2005-2008                  |                                         | 3.90 (2.42-6.28)                                       | 3.67 (2.20-6.12)   |                                   | 2.93 (1.87-4.59)                             | 2.18 (1.32-3.60)    |                           | 0.92 (0.80-1.06)                             | 1.03 (0.86-1.23)  |
|                                                      | 2009-2011                  |                                         | 7.75 (4.87-12.35)                                      | 8.01 (4.85-13.22)  |                                   | 4.07 (2.56-6.47)                             | 3.34 (2.00-5.59)    |                           | 0.82 (0.69-0.97)                             | 0.94 (0.78-1.13)  |
|                                                      | 2012-2015                  |                                         | 13.70 (8.87-21.17)                                     | 15.22 (9.47-24.45) |                                   | 4.08 (2.51-6.63)                             | 3.67 (2.18-6.18)    |                           | 0.93 (0.78-1.10)                             | 1.07 (0.87-1.31)  |
| <b>Comorbidity</b>                                   | Diabetes mellitus          |                                         | 1.57 (1.41-1.74)                                       | 1.37 (1.23-1.52)   |                                   | 2.36 (1.98-2.82)                             | 1.82 (1.52-2.19)    |                           | 1.12 (1.00-1.25)                             | 1.12 (1.00-1.26)  |
|                                                      | IHD                        |                                         | 0.90 (0.80-1.01)                                       | 0.86 (0.76-0.96)   |                                   | 1.07 (0.89-1.28)                             | 0.94 (0.78-1.13)    |                           | 0.95 (0.86-1.04)                             | 0.97 (0.87-1.07)  |
|                                                      | Cardiac failure            |                                         | 2.30 (2.01-2.62)                                       | 1.65 (1.44-1.90)   |                                   | 2.12 (1.71-2.63)                             | 1.20 (0.97-1.47)    |                           | 2.06 (1.82-2.33)                             | 2.00 (1.77-2.27)  |
|                                                      | Arrhythmia                 |                                         | 1.37 (1.20-1.55)                                       | 1.32 (1.16-1.51)   |                                   | 1.12 (0.92-1.36)                             | 1.03 (0.85-1.25)    |                           | 1.24 (1.10-1.39)                             | 1.25 (1.11-1.40)  |
|                                                      | Hypertension               |                                         | 1.46 (1.28-1.67)                                       | 1.27 (1.10-1.47)   |                                   | 1.56 (1.27-1.92)                             | 1.00 (0.80-1.25)    |                           | 0.76 (0.70-0.84)                             | 0.82 (0.74-0.90)  |
| <b>Renal function (eGFR)</b>                         | eGFR <30                   |                                         |                                                        | 9.52 (7.75-11.68)  |                                   |                                              | 14.39 (11.06-18.74) |                           |                                              | 2.20 (1.84-2.64)  |
|                                                      | eGFR 30-44                 |                                         |                                                        | 3.70 (3.08-4.43)   |                                   |                                              | 4.37 (3.39-5.65)    |                           |                                              | 1.27 (1.10-1.45)  |
|                                                      | eGFR 45-59                 |                                         |                                                        | 1.95 (1.65-2.30)   |                                   |                                              | 1.86 (1.45-2.40)    |                           |                                              | 0.98 (0.84-1.13)  |
|                                                      | eGFR ≥60                   |                                         |                                                        | reference          |                                   |                                              | reference           |                           |                                              | reference         |
|                                                      | Absent                     |                                         |                                                        | 1.93 (1.41-2.64)   |                                   |                                              | 1.45 (0.94-2.24)    |                           |                                              | 1.30 (1.10-1.54)  |
| <b>History of renal/urological disease</b>           | Prostate                   |                                         |                                                        | 0.79 (0.65-0.96)   |                                   |                                              | 0.74 (0.53-1.03)    |                           |                                              | 0.60 (0.49-0.73)  |
|                                                      | Calculi                    |                                         |                                                        | 0.90 (0.66-1.22)   |                                   |                                              | 0.97 (0.61-1.53)    |                           |                                              | 0.78 (0.57-1.08)  |
|                                                      | Malignancy                 |                                         |                                                        | 1.11 (0.43-2.89)   |                                   |                                              | 0.99 (0.24-4.10)    |                           |                                              | 1.00 (0.37-2.70)  |
|                                                      | Structural                 |                                         |                                                        | 1.13 (0.76-1.69)   |                                   |                                              | 0.87 (0.43-1.76)    |                           |                                              | 0.44 (0.24-0.81)  |
| <b>RAS blocker and/or potassium-sparing diuretic</b> | Neither                    |                                         |                                                        | Reference          |                                   |                                              | reference           |                           |                                              | reference         |
|                                                      | RAS blocker <i>or</i> KSD  |                                         |                                                        | 1.03 (0.92-1.16)   |                                   |                                              | 1.98 (1.60-2.44)    |                           |                                              | 0.77 (0.69-0.85)  |
|                                                      | RAS blocker <i>and</i> KSD |                                         |                                                        | 2.08 (1.63-2.67)   |                                   |                                              | 6.17 (4.54-8.39)    |                           |                                              | 0.99 (0.76-1.29)  |

All models use robust standard errors to account for clustering by general practice.

UTI: urinary tract infection; IHD: Ischaemic heart disease; RAS blocker: renin-angiotensin system blocker; KSD: potassium-sparing diuretic; eGFR: estimated glomerular filtration rate; N/A: not applicable

**Table S2.** Adjusted odds ratios (95% CIs) for AKI, hyperkalaemia and death following antibiotic treatment for urinary tract infection in the main analysis and additional sensitivity analyses.

|                                                                                                                                              | N              | Fully adjusted* odds ratio (95% CI) |                         |                         |                         |                         |
|----------------------------------------------------------------------------------------------------------------------------------------------|----------------|-------------------------------------|-------------------------|-------------------------|-------------------------|-------------------------|
|                                                                                                                                              |                | Amoxicillin                         | Trimethoprim            | Cefalexin               | Ciprofloxacin           | Nitrofurantoin          |
| <b>Acute kidney injury</b>                                                                                                                   |                |                                     |                         |                         |                         |                         |
| <b>Main analysis*</b>                                                                                                                        | <b>422,514</b> | <b>Reference</b>                    | <b>1.72 (1.31-2.24)</b> | <b>1.01 (0.74-1.37)</b> | <b>1.48 (1.03-2.13)</b> | <b>0.89 (0.65-1.24)</b> |
| 1. Using robust standard errors to account for clustering by patient as a result of patients contributing more than one UTI to the analysis. | 422,514        | Reference                           | 1.72 (1.33-2.22)        | 1.01 (0.75-1.37)        | 1.48 (1.06-2.07)        | 0.89 (0.67-1.20)        |
| 2. Antibiotic exposure defined as antibiotic prescription on the same day as a record of a UTI morbidity code.                               | 416,680        | Reference                           | 1.80 (1.35-2.39)        | 1.03 (0.74-1.43)        | 1.55 (1.06-2.26)        | 0.91 (0.65-1.28)        |
| 3. Excluding prescriptions for antibiotics where patient received antibiotic in the 28 days prior to UTI.                                    | 382,576        | Reference                           | 1.73 (1.30-2.29)        | 1.09 (0.79-1.49)        | 1.48 (1.01-2.17)        | 0.84 (0.59-1.20)        |
| 4. Limiting the analysis to the first recorded antibiotic-treated UTI for each individual during eligible follow up.                         | 126,459        | Reference                           | 1.58 (1.07-2.33)        | 0.85 (0.53-1.36)        | 1.26 (0.74-2.16)        | 0.85 (0.53-1.37)        |
| 5. Antibiotic exposure defined as antibiotic prescription for any indication.                                                                | 2,764,740      | Reference                           | 2.36 (2.22-2.51)        | 1.27 (1.16-1.40)        | 1.82 (1.65-2.02)        | 1.34 (1.21-1.47)        |
| 6. AKI defined as occurring within 7 days after antibiotic prescription.                                                                     | 422,514        | Reference                           | 1.74 (1.24-2.44)        | 1.09 (0.74-1.59)        | 1.65 (1.08-2.53)        | 0.86 (0.59-1.26)        |
| 7. Additionally adjusted for IMD quintile and lifestyle covariates: BMI, smoking status and alcohol status.                                  | 368,256        | Reference                           | 1.71 (1.30-2.27)        | 1.02 (0.73-1.43)        | 1.43 (0.98-2.09)        | 0.87 (0.62-1.21)        |
| 8. Limiting study population to individuals with ethnicity recorded in CPRD or HES, who became eligible for study entry from 2006.**         | 189,574        | Reference                           | 1.76 (1.25-2.47)        | 0.94 (0.62-1.41)        | 1.43 (0.91-2.26)        | 0.89 (0.59-1.34)        |
| 9. Limiting study population to users of RAS blockers on date of antibiotic prescription***                                                  | 135,152        | Reference                           | 1.92 (1.29-2.87)        | 1.02 (0.63-1.63)        | 1.34 (0.76-2.38)        | 1.00 (0.64-1.55)        |
| 10. Limiting to those with known baseline renal function.                                                                                    | 343,166        | Reference                           | 1.72 (1.31-2.25)        | 1.03 (0.76-1.41)        | 1.45 (0.99-2.12)        | 0.86 (0.62-1.20)        |
| <b>Hyperkalaemia</b>                                                                                                                         |                |                                     |                         |                         |                         |                         |
| <b>Main analysis*</b>                                                                                                                        | <b>422,514</b> | <b>Reference</b>                    | <b>2.27 (1.49-3.45)</b> | <b>1.20 (0.77-1.85)</b> | <b>1.17 (0.68-2.02)</b> | <b>1.07 (0.65-1.75)</b> |
| 1. Using robust standard errors to account for clustering by patient as a result of patients contributing more than one UTI to the analysis. | 422,514        | Reference                           | 2.27 (1.51-3.39)        | 1.20 (0.76-1.90)        | 1.17 (0.68-2.01)        | 1.07 (0.67-1.70)        |
| 2. Antibiotic exposure defined as antibiotic prescription on the same day as a record of a UTI morbidity code.                               | 416,680        | Reference                           | 2.30 (1.49-3.54)        | 1.21 (0.77-1.89)        | 1.18 (0.67-2.06)        | 1.03 (0.62-1.71)        |
| 3. Excluding prescriptions for antibiotics where patient received antibiotic in the 28 days prior to UTI.                                    | 382,576        | Reference                           | 1.96 (1.30-2.95)        | 1.08 (0.70-1.66)        | 1.15 (0.67-1.98)        | 0.92 (0.56-1.51)        |
| 4. Limiting the analysis to the first recorded antibiotic-treated UTI for each individual during eligible follow up.                         | 126,459        | Reference                           | 1.18 (0.73-1.90)        | 0.48 (0.26-0.91)        | 0.79 (0.38-1.65)        | 0.64 (0.31-1.32)        |
| 5. Antibiotic exposure defined as antibiotic prescription for any indication.                                                                | 2,764,740      | Reference                           | 2.52 (2.30-2.76)        | 1.29 (1.14-1.46)        | 1.42 (1.23-1.64)        | 1.26 (1.10-1.44)        |
| 6. Hyperkalaemia defined as occurring within 7 days after antibiotic prescription.                                                           | 422,514        | Reference                           | 2.16 (1.27-3.68)        | 1.28 (0.73-2.25)        | 1.13 (0.57-2.23)        | 0.84 (0.44-1.61)        |
| 7. Additionally adjusted for IMD quintile and lifestyle covariates: BMI, smoking status and alcohol status.                                  | 368,256        | Reference                           | 2.25 (1.45-3.48)        | 1.26 (0.79-2.02)        | 1.19 (0.66-2.14)        | 0.97 (0.58-1.64)        |
| 8. Limiting study population to individuals with ethnicity recorded in CPRD or HES, who became eligible for study entry from 2006.**         | 189,574        | Reference                           | 2.01 (1.21-3.33)        | 0.78 (0.42-1.46)        | 0.76 (0.34-1.70)        | 0.92 (0.50-1.67)        |
| 9. Limiting study population to users of RAS blockers on date of antibiotic prescription***                                                  | 135,152        | Reference                           | 2.22 (1.34-3.68)        | 0.87 (0.50-1.51)        | 1.12 (0.56-2.26)        | 0.91 (0.49-1.68)        |
| 10. Limiting to those with known baseline renal function.                                                                                    | 343,166        | Reference                           | 2.25 (1.45-3.47)        | 1.19 (0.76-1.87)        | 1.22 (0.70-2.14)        | 1.07 (0.65-1.78)        |
| <b>Death</b>                                                                                                                                 |                |                                     |                         |                         |                         |                         |
| <b>Main analysis*</b>                                                                                                                        | <b>422,514</b> | <b>Reference</b>                    | <b>0.90 (0.76-1.07)</b> | <b>0.97 (0.80-1.18)</b> | <b>0.92 (0.73-1.15)</b> | <b>0.72 (0.58-0.89)</b> |
| 1. Using robust standard errors to account for clustering by patient as a result of patients contributing more than one UTI to the analysis. | 422,514        | Reference                           | 0.90 (0.76-1.07)        | 0.97 (0.80-1.18)        | 0.92 (0.72-1.16)        | 0.72 (0.59-0.89)        |
| 2. Antibiotic exposure defined as antibiotic prescription on the same day as a record of a UTI morbidity code.                               | 416,680        | Reference                           | 0.94 (0.79-1.12)        | 1.01 (0.82-1.24)        | 0.95 (0.75-1.20)        | 0.73 (0.59-0.91)        |
| 3. Excluding prescriptions for antibiotics where patient received antibiotic in the 28 days prior to UTI.                                    | 382,576        | Reference                           | 0.86 (0.73-1.03)        | 0.98 (0.80-1.19)        | 0.85 (0.66-1.09)        | 0.73 (0.58-0.91)        |
| 4. Limiting the analysis to the first recorded antibiotic-treated UTI for each individual during eligible follow up.                         | 126,459        | Reference                           | 0.88 (0.67-1.15)        | 1.06 (0.77-1.45)        | 0.77 (0.49-1.19)        | 0.83 (0.59-1.15)        |
| 5. Antibiotic exposure defined as antibiotic prescription for any indication.                                                                | 2,764,740      | Reference                           | 0.71 (0.68-0.75)        | 0.83 (0.78-0.88)        | 0.87 (0.81-0.94)        | 0.51 (0.47-0.55)        |
| 6. Sudden death defined as occurring within 7 days after antibiotic prescription.                                                            | 422,514        | Reference                           | 0.89 (0.72-1.12)        | 0.94 (0.72-1.21)        | 0.83 (0.59-1.15)        | 0.63 (0.48-0.84)        |
| 7. Additionally adjusted for IMD quintile and lifestyle covariates: BMI, smoking status and alcohol status.                                  | 368,256        | Reference                           | 0.81 (0.67-0.98)        | 0.87 (0.69-1.09)        | 0.83 (0.63-1.10)        | 0.72 (0.57-0.92)        |
| 8. Limiting study population to individuals with ethnicity recorded in CPRD or HES, who became eligible for study entry from 2006.**         | 189,574        | Reference                           | 1.20 (0.88-1.63)        | 1.38 (0.99-1.93)        | 1.06 (0.70-1.62)        | 0.92 (0.66-1.29)        |
| 9. Limiting study population to users of RAS blockers on date of antibiotic prescription and death within 7 days***                          | 135,152        | Reference                           | 1.51 (0.87-2.65)        | 1.25 (0.65-2.42)        | 1.00 (0.52-1.93)        | 0.94 (0.49-1.80)        |
| 10. Limiting study population to users of RAS blockers on date of antibiotic prescription and death within 14 days***                        | 135,152        | Reference                           | 1.12 (0.80-1.57)        | 0.94 (0.61-1.44)        | 1.05 (0.66-1.67)        | 0.85 (0.57-1.29)        |
| 11. Limiting to those with known baseline renal function                                                                                     | 343,166        | Reference                           | 0.95 (0.79-1.14)        | 0.97 (0.78-1.14)        | 0.91 (0.71-1.16)        | 0.77 (0.61-0.97)        |

\*Unless otherwise stated, adjusted for the following recorded on or before the date of antibiotic prescription: age, sex, chronic comorbidities, calendar period, renal or urological disease, baseline renal function, and use of RAS blockers and/or potassium-sparing diuretics. \*\*Using ethnicity both in the equation used to calculate eGFR and as covariate in the analysis. \*\*\*Adjusted for use of potassium-sparing diuretics. IMD: Index of multiple deprivation; BMI: body mass index; UTI: urinary tract infection
